# Supplementary material
Source: MDPI journal article supplement (https://www.mdpi.com/2077-0472/11/11/1032)
Supplement: s1 [file s1]

**Table S1. Ingredients of the basal concentrate fed to young bulls**

| Ingredient                       | % as feed |
|----------------------------------|-----------|
| Corn, flour                      | 32        |
| Corn, flakes                     | 17.5      |
| Barley                           | 9.5       |
| Soybean, flakes                  | 11        |
| Soybeans, seeds                  | 7         |
| Wheat flour                      | 5         |
| Sunflower                        | 9         |
| Fine wheat bran                  | 4         |
| Mineral-Vitamin supplementation* | 5         |

\* Contents per kg: Vitamin A 16,000 UI, Vitamin D3 1,600 UI, Vitamina B1 2 mg, Vitamin E 16 mg, Mn 42.68 mg, Fe 16 mg, I 2.68 mg, Cu 8 mg, Se 0.13 mg, Zn 80 mg
